1 **Mediator is essential for small nuclear and nucleolar RNA transcription in yeast**

2

3 Jason P. Tourigny<sup>a</sup>, Moustafa M. Saleh<sup>a</sup>, Gabriel E. Zentner<sup>a#</sup>

4

5 <sup>a</sup>Department of Biology, Indiana University, Bloomington, IN, USA

6

7 #Address correspondence to Gabriel E. Zentner, [gzentner@indiana.edu](mailto:gzentner@indiana.edu)

8

9 Running head: Mediator regulates sn/snoRNAs

10

11 Abstract word count: 198

12 Introduction/results/discussion word count: 3,085

13 Materials and methods word count: 1,433

14 **Abstract**

15 Eukaryotic RNA polymerase II (RNAPII) transcribes mRNA genes as well as non-protein coding  
16 RNAs (ncRNAs) including small nuclear and nucleolar RNAs (sn/snoRNAs). In metazoans,  
17 RNAPII transcription of sn/snoRNAs is facilitated by a number of specialized complexes, but no  
18 such complexes have been discovered in yeast. It has thus been proposed that yeast  
19 sn/snoRNA promoters use the same complement of factors as mRNA promoters, but the extent  
20 to which key regulators of mRNA genes act at sn/snoRNA genes in yeast is unclear. Here, we  
21 investigated a potential role for the Mediator complex, essential for mRNA gene transcription, in  
22 the transcription of sn/snoRNA genes. We found that the complete Mediator complex maps to  
23 most sn/snoRNA gene regulatory regions and that loss of Mediator function results in a robust  
24 reduction in RNAPII and TFIIB occupancy at sn/snoRNA genes. Furthermore, deletion of  
25 subunits of the activator-interacting Mediator tail module does not affect Mediator recruitment to,  
26 or transcription of, sn/snoRNAs. Taken together, our analyses indicate that Mediator promotes  
27 PIC formation and transcription at sn/snoRNA genes, expanding the role of this critical regulator  
28 beyond its known functions in mRNA gene transcription and demonstrating further mechanistic  
29 similarity between the transcription of mRNA and sn/snoRNA genes.

## 30 Introduction

31 Eukaryotic RNA polymerase II (RNAPII), responsible for the transcription of mRNA genes, also  
32 transcribes several classes of non-protein coding RNA (ncRNA) genes. Two prominent classes  
33 of RNAPII-transcribed eukaryotic ncRNA genes are small nuclear and small nucleolar RNAs  
34 (sn/snoRNAs). snRNAs are involved in pre-mRNA splicing (1), while snoRNAs primarily function  
35 in ribosomal RNA (rRNA) maturation via methylation and pseudouridylation of specific rRNA  
36 bases (2).

37 Most sn/snoRNA transcription in eukaryotes is carried out by RNAPII, with a few notable  
38 RNAPIII-transcribed exceptions including the *U6* snRNA gene (3). While transcription of both  
39 mRNA and the majority of sn/snoRNA genes is carried out by RNAPII, notable differences  
40 between their regulation have been described, particularly in metazoans. In addition to the  
41 documented dependence of a handful of sn/snoRNAs on several general transcription factors  
42 (GTFs) that are components of the pre-initiation complex and generally essential for RNAPII  
43 transcription (TFIIA, TFIIB, TFIID, TFIIIE, TFIIIF, and TFIIH) (4-6), metazoan sn/snoRNA gene  
44 transcription relies on a number of specialized factors. One such factor is the small nuclear RNA  
45 activating complex (SNAPc), which contains the TATA-binding protein (TBP) and five specific  
46 subunits and is essential for transcription from sn/snoRNA promoters *in vitro* (7-9). Metazoan  
47 sn/snoRNA gene transcription also involves the little elongation complex (LEC), which promotes  
48 RNAPII occupancy and elongation at these genes (10). Lastly, the Integrator complex, which  
49 contributes to both transcriptional elongation and 3' end processing, is involved in metazoan  
50 sn/snoRNA expression (11, 12). Metazoan RNAPII-regulated sn/snoRNA promoters also  
51 contain specialized DNA motifs, the distal and proximal sequence elements (DSE and PSE),  
52 both of which are also found in type 3 RNAPIII promoters (13). The DSE is similar to an  
53 enhancer element, containing binding sites for a number of transcription factors (TFs) including  
54 Oct1 and ZNF143 (14). Oct1 and ZNF143 enhance the transcription of sn/snoRNAs by  
55 promoting the association of SNAPc with the PSE (7, 14-16). Notably, TATA boxes are present

56 in RNAPIII- but not RNAPII-regulated sn/snoRNA promoters (14), and insertion of a TATA box  
57 into the promoter of the RNAPII-transcribed *U2* snRNA gene switches it to a target of RNAPIII  
58 (17, 18).

59 In contrast to metazoans, no sn/snoRNA-specialized transcriptional regulatory  
60 complexes or sequence elements have been described in yeast, which uses RNAPII to  
61 transcribe all sn/snoRNA genes with the exception of the RNAPIII-transcribed *U6* snRNA and  
62 the *snR52* snoRNA (19). Instead, it has been proposed that yeast RNAPII uses the same set of  
63 factors to facilitate the transcription of mRNA and sn/snoRNA genes. Indeed, early studies of  
64 the promoter region of the polycistronic *snR78-72* gene defined a binding site for the telomere-  
65 binding TF Rap1, a key regulator of ribosomal protein gene expression (20), an AT-rich region,  
66 and a TATA box (21). A genomic analysis of yeast snoRNAs revealed the presence of these  
67 elements in various proportions across 57 promoters as well as additional motifs including  
68 binding sites for the TF Reb1, rRNA processing elements, and binding sites for the telomere-  
69 associated TF Tbf1, which was reported to activate transcription of the *snR64* snoRNA gene  
70 (22). Beyond these observations, however, the extent to which mRNA and sn/snoRNA genes  
71 depend on the same RNAPII-associated factors for expression is unclear.

72 One promising candidate for a regulatory factor used by RNAPII at both mRNA and  
73 sn/snoRNA genes is Mediator, a modular, evolutionarily conserved complex required for the  
74 majority of mRNA transcription in yeast (23-25). The 25 subunits of yeast Mediator are divided  
75 into four modules: head, middle, tail, and kinase. Mediator associates with transcriptional  
76 activators at distal regulatory elements via its tail module and RNAPII at promoters via its head  
77 module, thus integrating distinct regulatory inputs to promote assembly of the PIC and  
78 subsequent transcriptional initiation (26). While the role of Mediator in mRNA transcription has  
79 been extensively studied, little is known about its relationship to RNAPII transcription of  
80 ncRNAs. In mouse embryonic stem cells, Mediator forms a meta-coactivator complex (MECO)  
81 with the Ada-Two-A-containing (ATAC) histone acetyltransferase complex that associates with a

82 small number of snRNA genes to promote their expression (27). Furthermore, the metazoan-  
83 specific Mediator subunit Med26 has been implicated in the transcription of a small number of  
84 sn/snoRNA genes in mouse and human cells via recruitment of LEC (28). These observations  
85 suggest that Mediator is an important regulator of sn/snoRNA gene transcription; however,  
86 important questions remain. First, as the above studies analyzed a selected few loci, it is  
87 unclear if any role of Mediator in promoting sn/snoRNA gene transcription is global. Moreover,  
88 as the above studies analyzed Mediator function in the context of interactions with metazoan-  
89 specific complexes (ATAC, LEC) and a metazoan-specific Mediator subunit (Med26), it is  
90 unknown if Mediator functions in organisms lacking these components of the transcription  
91 machinery. Lastly, it has not been tested if the function of Mediator in PIC assembly is relevant  
92 at sn/snoRNA gene promoters.

93 Here, we sought to determine if Mediator plays a global role in the transcription of  
94 sn/snoRNA genes in yeast. Using genome-wide analyses, we found that upstream regions  
95 potentially equivalent to mRNA gene upstream activating sequences (UASs) and promoters of  
96 sn/snoRNA genes are occupied by Mediator. Inducible depletion of the structurally essential  
97 Mediator subunit Med14 results in equivalent reductions in RNAPII association with sn/snoRNA  
98 and mRNA genes, indicating an essential role of the complete Mediator complex in sn/snoRNA  
99 gene transcription. Similar to its function at mRNA genes, Mediator promotes PIC assembly at  
100 sn/snoRNA gene promoters. Interestingly, removal of subunits of the Mediator tail module,  
101 responsible for interactions with transcriptional activators, does not affect Mediator recruitment  
102 to sn/snoRNA genes. Our results indicate that tail-independent recruitment of Mediator to  
103 sn/snoRNA genes is required for their transcription and suggest mechanistic similarities in  
104 Mediator activity at yeast mRNA and sn/snoRNA genes.

105

## 106 **Results**

### 107 **Mediator associates with sn/snoRNA genes**

108 We first assessed the genomic localization of Mediator with respect to sn/snoRNA genes using  
109 chromatin endogenous cleavage and high-throughput sequencing (ChEC-seq) (29), which we  
110 previously showed effectively maps Mediator binding to UASs (30). However, we only mapped  
111 subunits of the Mediator head module. In order to interrogate the localization of the entire  
112 Mediator complex, we mapped the Med8 subunit from the head module as well as the scaffold  
113 subunit Med14 and the tail module subunit Med3. Visual inspection of ChEC-seq and ChIP-seq  
114 data revealed enrichment of Med8, Med14, and Med3 at the intergenic region of the divergent  
115 *snR31* and *snR5* snoRNA genes (Fig. 1A). To analyze these data more systematically, we  
116 compiled a list of 70 RNAPII-transcribed sn/snoRNA genes not overlapping protein-coding  
117 genes, condensed to 58 loci due to the existence of five polycistronic snoRNA clusters in the  
118 yeast genome (31) (see Materials and Methods), and aggregated data at these positions. This  
119 analysis revealed strong peaks of Med8, Med14, and Med3 enrichment over free MNase signal  
120 upstream of sn/snoRNA TSSs (Fig. 1B). Notably, the position of maximum Mediator subunit  
121 occupancy was relatively far upstream of sn/snoRNA TSSs (421 bp for Med8 and 403 bp for  
122 Med14 and Med3), potentially consistent with Mediator association with upstream activating  
123 sequences (UASs), where it binds most prominently to mRNA genes under normal conditions  
124 (30, 32). Notably, the dynamic ranges and signal-to-noise ratios of the Med14 and Med3 ChEC-  
125 seq data were much higher than that of the Med8 data at sn/snoRNA genes. This may reflect  
126 the potentially shorter distances of the C-termini of Med14 and Med3 than Med8 to DNA (33).  
127 To more quantitatively assess enrichment of Mediator at sn/snoRNA genes, we called peaks on  
128 the Med14 ChEC-seq dataset with the free MNase dataset as a control. We then assessed the  
129 58 analyzed sn/snoRNA TSSs for proximal peaks. Of these, 41/58 (70.7%) displayed a  
130 significant Med14 peak at the threshold used, indicating that the majority of sn/snoRNA  
131 promoters.

132 Having observed association of complete Mediator with putative sn/snoRNA gene UASs,  
133 we sought to determine if we could also detect Mediator association with sn/snoRNA gene

134 promoters, which occurs via interactions of the head module with the carboxy-terminal domain  
135 (CTD) of RNAPII (34). When the CTD is phosphorylated by the TFIIH kinase Kin28, Mediator is  
136 rapidly released from the PIC (35), and it has been shown that efficient detection of promoter-  
137 associated Mediator by ChIP requires impairment of Kin28 function in order to trap Mediator in  
138 complex with the PIC (32, 36). We previously found that ChEC-seq does not map Mediator  
139 binding to promoters upon Kin28 inhibition, presumably due to occlusion of promoter DNA by  
140 the PIC (30). Thus, to interrogate Mediator association with sn/snoRNA promoters, we obtained  
141 ChIP-chip data from a previous study in which the genome-wide association of twelve Mediator  
142 subunits (“MetaMediator”) was profiled following inhibition of *kin28as*, a form of Kin28 sensitive  
143 to the ATP analog 1-Naphthyl PP1 (1-NA-PP1) (33). Visual inspection of MetaMediator signal at  
144 the *snR69* snoRNA gene revealed little upstream enrichment of Mediator in wild-type (WT) cells  
145 treated with 1-NA-PP1 (Fig. 1C), consistent with the reported low ChIP efficiency of Mediator at  
146 the upstream regions of many highly-transcribed genes (32, 37). However, *kin28as* cells treated  
147 with 1-NA-PP1 displayed a marked increase in MetaMediator enrichment just upstream of the  
148 *snR69* TSS (Fig. 1C). Systematic analysis of MetaMediator occupancy in WT and *kin28as* cells  
149 confirmed this single-locus observation across the genome (Fig. 1D). Based on these  
150 observations, we conclude that the complete Mediator complex associates with both putative  
151 UASs and promoters at sn/snoRNA genes, suggesting mechanistic similarities in the activity of  
152 Mediator at these distinct classes of genes.

153

#### 154 **RNAPII occupancy of sn/snoRNA genes is Mediator-dependent**

155 Having established that most sn/snoRNA genes are bound by Mediator, we set out to determine  
156 what effect its loss would have on sn/snoRNA gene transcription. We used native RNAPII ChIP-  
157 seq data from a previous study in which Med14, essential for the structural integrity of Mediator  
158 (23, 38), was depleted from yeast cells using the auxin degron system (24). In this approach, a  
159 target protein is tagged with an auxin-inducible degron (AID) consisting of a 3xV5 tag and the

160 auxin repressor protein IAA7 in a yeast strain constitutively expressing the *Oryza sativa*  
161 ubiquitin ligase OsTIR1. In the presence of auxin, a complex is formed between OsTIR1 and the  
162 AID-tagged protein, resulting in ubiquitylation and degradation of the target protein (39). This  
163 method was reported to yield nearly complete destruction of Med14 within 30 min (24).  
164 Importantly, the reported ChIP-seq experiments used a defined amount of *S. pombe* cells as a  
165 spike-in, allowing for quantification of global changes in RNAPII binding to the genome. Indeed,  
166 using this approach, the authors found that Mediator destabilization via Med14 degradation  
167 reduced the transcription of nearly all ~4,800 analyzed mRNA genes (24).

168 We obtained data for two RNAPII ChIP-seq replicates treated with either vehicle  
169 (DMSO) or 500  $\mu$ M of the auxin indole-3-acetic acid (3-IAA) to deplete Med14 as well as  
170 replicates of RNAPII ChIP-seq from WT cells treated with DMSO or 3-IAA. We first visualized  
171 RNAPII signal at three regions of the genome harboring one or more sn/snoRNAs. WT cells  
172 (that is, those bearing OsTIR1 but not Med14-AID) displayed robust RNAPII occupancy of the  
173 snoRNA genes *snR17b*, *snR190-snR128*, *NME1*, and *snR66* when treated with either DMSO or  
174 3-IAA, as did Med14-AID cells treated with DMSO. However, RNAPII signal at these genes was  
175 almost completely eliminated in Med14-AID cells treated with 3-IAA (Fig. 2). We next quantified  
176 RNAPII ChIP-seq signal within the 83 bp downstream of each sn/snoRNA TSS (corresponding  
177 to the length of the shortest analyzed gene). As observed at the individual genomic regions  
178 analyzed above, 3-IAA treatment of WT yeast had essentially no effect on RNAPII occupancy of  
179 either sn/snoRNA or mRNA genes, for which we quantified RNAPII ChIP-seq signal in the 100  
180 bp downstream of each TSS (Fig. 3). However, depletion of Med14 strongly reduced RNAPII  
181 ChIP-seq signal in all 58 tested sn/snoRNA genes (median  $\log_2(\text{fold change}) = -3.72$ ), and the  
182 extent of the reduction in sn/snoRNA gene RNAPII occupancy was comparable to that observed  
183 for the 1,000 most highly-RNAPII occupied mRNA in DMSO-treated Med14-AID cells (median  
184  $\log_2(\text{fold change}) = -3.62$ ) (Fig. 3).

185



## 186 **Mediator promotes PIC formation at sn/snoRNA gene promoters**

187 A major function of Mediator *in vitro* and *in vivo* is proposed to be stimulation of PIC formation  
188 (32, 40-43). Given that loss of Mediator results in a marked reduction in RNAPII occupancy  
189 within sn/snoRNA gene coding regions (Fig. 2-3), we asked if it would also reduce PIC  
190 formation at sn/snoRNA gene promoters. To this end, we constructed a Med14-AID strain with a  
191 FLAG-tagged form of *SUA7*, encoding TFIIB, to allow ChIP-seq analysis of PIC formation.  
192 Consistent with previous data (24), we observed near-total degradation of Med14 within 30 min  
193 of 3-IAA addition (Fig. 4A). In line with the essential role of Med14, Med14-AID cells did not  
194 grow on solid medium containing 3-IAA (Fig. 4B). To measure PIC assembly at sn/snoRNA  
195 gene promoters, we performed two replicates of TFIIB ChIP-seq following a 30 m treatment with  
196 DMSO or 3-IAA. Consistent with the reduction in RNAPII occupancy we observed above (Fig. 2-  
197 3), most analyzed sn/snoRNA promoters displayed moderately reduced TFIIB binding (median  
198  $\log_2(\text{fold change}) = -0.95$ ), similar to what we observed at the 1,000 most highly TFIIB-occupied  
199 mRNA gene promoters (median  $\log_2(\text{fold change}) = -0.88$ ) (Fig. 4C). This observation indicates  
200 that the role of Mediator in promoting PIC formation is conserved between mRNA and  
201 sn/snoRNA genes.

202

## 203 **The Mediator tail module is not required for sn/snoRNA transcription**

204 At mRNA genes, Mediator binds most prominently to UASs via interactions with transcriptional  
205 activators and only transiently associates with core promoters (32, 36). We thus asked if the  
206 Mediator tail, responsible for activator interactions, is required for recruitment of Mediator to  
207 sn/snoRNA genes. We tested if deletion of Med15, a tail subunit and major target of activators  
208 (44, 45), would impact the recruitment of Mediator to sn/snoRNA genes. We queried our  
209 previous ChEC-seq data in which binding of Med17 was mapped in either a WT or *med15* $\Delta$   
210 background (30), assessing the effects of *MED15* deletion on Mediator binding to sn/snoRNA  
211 genes and mRNA genes classified by SAGA/TFIID coactivator dependence (46), as the

212 Mediator tail module has been reported to act most prominently at SAGA-dominated genes (47).  
213 Consistent with the reported dependence of SAGA-dominated genes on the Mediator tail  
214 module, Med17 binding at the UASs of the 50 most Mediator-enriched SAGA-dominated gene  
215 UASs was markedly decreased in the *med15* $\Delta$  strain (median  $\log_2$ (fold change) = -2.59), while  
216 Med17 enrichment at the 500 most Mediator-enriched TFIID-dependent gene UASs was on  
217 average only slightly decreased (median  $\log_2$ (fold change) = -0.39) (Fig. 5A). In contrast, Med17  
218 association with sn/snoRNA gene upstream regions was slightly increased in the *med15* $\Delta$   
219 background (median  $\log_2$ (fold change) = 0.52) (Fig. 5A), indicating that activator-tail module  
220 interactions may not be a major determinant of Mediator recruitment to sn/snoRNAs in yeast.

221 To investigate the potential dispensability of the Mediator tail for sn/snoRNA  
222 transcription, we analyzed RNAPII ChIP-seq data from WT yeast and a strain lacking *MED3* and  
223 *MED15*, hereafter referred to as “tail deletion” (48). In line with the aforementioned dependence  
224 of SAGA-dominated genes on the tail, the 50 most highly RNAPII-bound SAGA-dominated  
225 genes displayed a strong decrease in RNAPII ChIP-seq signal in the tail deletion strain (median  
226  $\log_2$ (fold change) = -0.93), while the top 500 most robustly RNAPII-enriched, TFIID-dominated  
227 genes were substantially less affected (median  $\log_2$ (fold change) = -0.33) (Fig. 5B). In contrast,  
228 RNAPII ChIP-seq signal at sn/snoRNA genes was essentially unaffected in the tail deletion  
229 strain (median  $\log_2$ (fold change) = 0.33) (Fig. 5B). Visual inspection of the *snR8* locus confirmed  
230 the lack of effect of tail subunit deletion on Mediator and RNAPII binding (Fig. 5C). Taken  
231 together, these observations strongly suggest that the tail module is dispensable for Mediator  
232 regulation of sn/snoRNA transcription.

233

## 234 Discussion

235 Mediator is a conserved, essential transcriptional regulatory complex recently shown to be  
236 essential for the majority of RNAPII mRNA transcription in yeast. Here, we investigated its

237 contribution to the transcription of sn/snoRNA genes by RNAPII and found that Mediator  
238 associates with sn/snoRNA genes in a tail-independent manner and promotes their transcription  
239 at least in part by facilitating PIC assembly.

240 Our analysis of Mediator binding to the genome suggests that the regulatory  
241 organization of sn/snoRNA gene upstream regions is similar to that of mRNA genes. ChEC-seq,  
242 which we previously showed efficiently maps Mediator to UASs (30), delineated a peak of  
243 Mediator occupancy ~400 bp upstream of sn/snoRNA gene TSSs on average. This position is  
244 consistent with the location of UASs at mRNA genes (49), though this distance measurement  
245 may be an over- or underestimate, as MNase cleavage in ChEC occurs upstream or  
246 downstream of the tagged protein depending on its orientation. We also found that Mediator  
247 could be robustly detected at sn/snoRNA promoters upon inhibition of the TFIID kinase Kin28,  
248 consistent with previous observations at mRNA promoters (32, 36). This observation is also in  
249 line with the previously described role of Cdk7, the human ortholog of Kin28, in promoting  
250 RNAPII CTD phosphorylation at the *U1* and *U2* snRNA genes in human cells (5). This apparent  
251 organizational conservation of Mediator binding to sn/snoRNA and mRNA gene upstream  
252 regions is in line with the similar effects of Mediator depletion on RNAPII and TFIIB occupancy  
253 observed among both gene classes.

254 Our results also bear on how Mediator is recruited to sn/snoRNA genes. We found that  
255 deletion of the major activator-binding tail subunit Med15 has little effect on Mediator  
256 association with sn/snoRNA genes and that combined deletion of the tail subunits Med3 and  
257 Med15 does not reduce RNAPII occupancy of sn/snoRNA genes. These observations may  
258 indicate that, in terms of Mediator recruitment and function, sn/snoRNA genes are similar to  
259 genes traditionally classified as TFIID-dominated, whose expression is generally insensitive to  
260 loss of Mediator tail function (47). The tail has also been reported to be dispensible for Mediator  
261 occupancy at TFIID-dominated genes (48), though this has recently been questioned (33). One  
262 possible mechanism for recruitment of Mediator to sn/snoRNAs is via the interaction of

263 activators, including Tbf1, with other subunits of Mediator such as the tail/middle module  
264 connector Med16, which interacts with activators such as Gcn4 in yeast (45), DIF in *Drosophila*  
265 (50), and NRF2 in mouse and human (51). Indeed, a recent proteomic analysis of Mediator  
266 interactions reported a modest interaction between Mediator and Tbf1 (52). Mediator could also  
267 be recruited to sn/snoRNA genes independent of activators via interactions with the PIC (33, 53)  
268 (bioRxiv: <https://doi.org/10.1101/207282>).

269 Taken together, our results indicate that Mediator is globally required for sn/snoRNA  
270 transcription in yeast and that its core function, the facilitation of PIC formation, is conserved  
271 between mRNA and sn/snoRNA genes. Moving forward, it will be of interest to determine via  
272 genetic studies if the Mediator-bound upstream regions of sn/snoRNA genes enhance their  
273 transcription and are thus analogous to mRNA gene UASs. Studies to delineate the  
274 mechanisms of recruitment of Mediator to sn/snoRNA genes will also provide further insight into  
275 the degree of commonality in Mediator function and regulation between mRNA and sn/snoRNA  
276 genes.

277

## 278 **Materials and Methods**

### 279 **Yeast Methods**

280 Med8, Med14, and Med3 were tagged with 3xFLAG-MNase-HIS3MX6 using pGZ109 (30). The  
281 auxin degron parental strain GZY191 was generated by transformation of pSB2273 (kindly  
282 provided by Matthew Miller), encoding *GPD1* promoter-driven *OstTIR1*, into the *HIS3* locus in a  
283 wild-type BY4705 strain. *MED14* was tagged with AID using pL260 (kindly provided by Matthew  
284 Miller), encoding 3xV5-IAA7-kanMX6, resulting in strain GZY219. Lastly, *SUA7* was tagged with  
285 3xFLAG using pFA6a-6xGLY-3xFLAG-hphMX4 (a gift from Mark Hochstrasser, Addgene  
286 plasmid #20755), resulting in strain GZY231. Strain details are given in Table 1. Cells were  
287 grown in YPD at 30°C under constant agitation. For auxin treatment, a 100 mL culture at an

288 OD<sub>600</sub> of >0.8 was split into two flasks. One culture was treated with DMSO, the other with 500  
289 µM 3-IAA dissolved in DMSO, for 30 min.

290

### 291 **ChEC-seq**

292 ChEC-seq was performed as described (29) except for the size selection step. RNase-treated  
293 ChEC DNA was brought up to 200 µL with 10 mM Tris pH 8.0 and 160 µL SPRI beads (54)  
294 were added (0.8:1 beads:sample ratio versus the 2.5:1 ratio used in the original protocol). The  
295 sample was pipetted up and down ten times to mix and incubated at RT for 5 min. Beads were  
296 collected on a magnetic rack for 2 min and the supernatant was collected for DNA isolation.  
297 Sequencing libraries were prepared at the Indiana University Center for Genomics and  
298 Bioinformatics (CGB) using the NEBNext Ultra II Library Prep Kit for Illumina. Libraries were  
299 sequenced in paired-end mode on the Illumina NextSeq 500 platform at the CGB. Read lengths  
300 were 79 bp for Med8 and 42 bp for Med14 and Med3.

301

### 302 **ChIP-seq**

303 After DMSO or 3-IAA treatment, cultures were fixed with formaldehyde (1% final) for 10 minutes  
304 at room temperature (RT), then quenched with glycine (125 mM final) for 5 minutes. After  
305 washing with PBS, fixed cell pellets were preserved at -80°C. Thawed pellets were later  
306 spheroplasted by resuspension in PBS along with 90 µl of 5 mg/mL zymolyase for 5 m at 37°C.  
307 All ChIP solutions henceforth were supplemented with a protease inhibitor cocktail. After gentle  
308 centrifugation and washing with 1ml PBS, ~100ul spheroplasts were lysed with the addition of  
309 50µL lysis buffer (50 mM Tris pH 8.0, 150 mM NaCl, 10 mM EDTA, 3% SDS) at RT for 5 m.  
310 Lysates were then diluted to 1.5 mL with 1350 µL of dilution buffer (20 mM Tris pH 8.0, 150 mM  
311 NaCl, 2 mM EDTA, 1% Triton X-100) and transferred to a Covaris milliTube on ice. Sonication  
312 of diluted ChIP lysate was performed in a Covaris S220 sonicator, with parameters of 150 W  
313 Peak Power, 30% Duty Cycle, and 200 Cycles/burst, for a total sonication time of 150 s (on 30s

314 -- cool 15s, times 5). Thereafter, samples were centrifuged for 10 m at 21,000 x *g* and 4°C. The  
315 soluble lysates were then transferred to new tubes along with ~30 µL of Sigma FLAG beads  
316 (M8823) pre-blocked with BSA, and the IP was performed for 3h at 4°C. Beads were then  
317 washed 2 x 1 mL in fresh cold dilution buffer, and 1 x 1ml in LiCl wash buffer (20 mM Tris pH  
318 8.0, 250 mM LiCl, 1 mM EDTA, 1% Triton, 0.1% Nonidet-P40) at RT, with each wash lasting 3  
319 m. For extraction and de-crosslinking, washed beads were resuspended in 250 µL elution buffer  
320 (50 mM Tris pH 8.0, 250 mM NaCl, 10 mM EDTA, 1% SDS) with 60 µg proteinase K and  
321 incubated overnight at 1,200 RPM and 65°C in an Eppendorf ThermoMixer. The next morning,  
322 ChIP DNA was extracted with 200 µL phenol/chloroform/isoamyl alcohol, treated with 10 µg  
323 RNase A for 20 m at 37°C, re-extracted with phenol/chloroform, and precipitated with linear  
324 acrylamide in >80% EtOH at -80C overnight. Precipitated DNA was pelleted for 20 m at 4°C and  
325 21,000 x *g*, washed with RT 75% ethanol, re-spun for 5 m, dried at RT, and finally resuspended  
326 in 20 µL T low-E (50 mM Tris, 0.1 mM EDTA). ChIP-seq libraries were prepared and sequenced  
327 as described above for ChEC-seq libraries. Read lengths were 42 bp for the first pair of  
328 DMSO/3-IAA replicates and 38 bp for for the second replicate pair.

329

## 330 **Data analysis**

### 331 ***sn/snoRNA gene list***

332 We used the YeastMine QueryBuilder (<https://yeastmine.yeastgenome.org/>) to generate a list of  
333 sn/snoRNA genes. We first retrieved lists of items with data type “snRNA” (6 items) or “snoRNA”  
334 (77 items). For snRNA genes, the RNAPIII-transcribed *snR6* gene was removed and the  
335 overlapping *snR7-L* and *snR7-S* genes were condensed into the long isoform. For snoRNA  
336 genes, we used the overlapping features function of YeastMine to identify snoRNAs overlapping  
337 ORFs (13/77). Two snoRNA genes, *snR43* and *snR73*, were found to overlap a deleted and  
338 dubious ORF, respectively, and so were retained in the final list. The RNAPIII-transcribed  
339 *snR52* gene was removed from the final list. We also included the RNAPII-transcribed *TLC1*

340 gene, encoding telomerase RNA. This resulted in a list (Dataset S1, tab 1) containing 70 genes  
341 (4 snRNAs, 65 snoRNAs, and *TLC1*). For the purposes of our TSS-based analyses,  
342 polycistronic snoRNA clusters (*snR190-snR128*, *snR41-snR70-snR51*, *snR67-snR53*, *snR57-*  
343 *snR55-snR61*, and *snR78-snR77-snR76-snR75-snR74-snR73-snR72*) were considered as  
344 single genes, with the start coordinate of the first snoRNA in the cluster taken to be the cluster's  
345 TSS. This condensation resulted in a list of 58 loci (Dataset S1, tab 2).

346

### 347 **ChEC-seq**

348 Paired-end Med8, Med14, and Med3 ChEC-seq and 1 min *REB1* promoter-driven free MNase  
349 data (SRR1947784) were aligned to the sacCer3 genome build with Bowtie2 (55) using default  
350 settings plus ``-l 10 -X 700 --no-unal --dovetail --no-discordant --no-mixed``. The above free  
351 MNase dataset was used because it was generated in the W1588-4C background, which is  
352 congenic to the W303 background in which the Mediator ChEC-seq datasets were generated  
353 except that a weak *RAD5* mutation is corrected (56). Alignment SAM files were used to make  
354 tag directories with HOMER (<http://homer.ucsd.edu>) (57). HOMER ``annotatePeaks.pl`` was used  
355 to average signal. Average plots were generated with GraphPad Prism 7. Med14 peaks were  
356 called using HOMER ``findPeaks`` with the flags ``-style factor -F 2 -L 0 -fdr 0.05`` with the free  
357 MNase dataset as control. These parameters require that a peak be enriched at least twofold  
358 over free MNase at an FDR of 0.05 with no requirement for enrichment over local background.  
359 The distance of the Med14 peak midpoint closest to each sn/snoRNA TSS was determined with  
360 BEDTools ``closest`` (58) and each peak was visually inspected for its orientation relative to the  
361 corresponding sn/snoRNA gene. We required that a peak midpoint be within or no more than  
362 500 bp upstream of an sn/snoRNA gene to be considered associated with that gene. For  
363 analysis of Med17 binding, Mediator signal was quantified from -500 to -100 bp relative to the  
364 TSS using HOMER ``annotatePeaks.pl``. Lists of SAGA- and TFIIID-dependent genes were  
365 derived from our previous work (30), and we quantified signal at the the 50 most highly

366 Mediator-occupied SAGA-dominated gene UASs and the 500 most highly Mediator-occupied  
367 TFIID-dominated gene UASs as determined by signal in the WT strain.

368

### 369 **ChIP**

370 MetaMediator bedGraph files representing average ChIP-chip signal for 12 Mediator subunits  
371 were obtained from the supplementary material of Jeronimo *et al* (33) and visualized as  
372 described for ChEC-seq data. Paired-end spike-in RNAPII ChIP-seq data (Rpb3-3xFLAG) (24)  
373 were obtained from GEO (GSE97081) and aligned to both the *sacCer3* and EF2 (*S. pombe*)  
374 genome builds with Bowtie2 as for ChEC-seq. Tag directories were then created with HOMER.  
375 For genome browser visualization, we downloaded spike in-normalized wig files from GEO;  
376 these tracks thus offer independent confirmation of our systematic analyses of these data. For  
377 quantification of sn/snoRNA transcription, the total raw RNAPII signal in an 83 bp window  
378 downstream of the TSS (corresponding to length of the shortest analyzed monocistronic  
379 snoRNA gene, *snR79*) was determined using HOMER `annotatePeaks.pl`. The obtained values  
380 were then multiplied by a spike-in normalization factor N, the  $\log_2(3\text{-IAA/DMSO})$  ratio for each  
381 gene in each replicate was calculated, and ratios were averaged. For comparison, we analyzed  
382 the 1,000 most highly transcribed mRNA genes as determined by average spike in-normalized  
383 signal in the two DMSO-treated replicates of each auxin depletion experiment using a 100 bp  
384 window downstream of the TSS. The spike-in normalization factor N was calculated as 10,000 /  
385 number of reads mapped to the *S. pombe* genome and used by HOMER for generation of a tag  
386 directory. Paired-end TFIIB ChIP-seq data were processed as described for ChEC-seq data.  
387 TFIIB signal was quantified from -150 to +50 relative to the TSSs of sn/snoRNA genes and the  
388 1,000 most TFIIB-occupied mRNA promoters as determined by average RPM-normalized signal  
389 in the -150 to +50 window, the  $\log_2(3\text{-IAA/DMSO})$  ratio for each gene in each replicate was  
390 calculated, and ratios were averaged. Single-end RNAPII ChIP-seq data (Rpb1) from WT and  
391 tail deletion strains (48) were obtained from the SRA (SRP047524) and aligned to *sacCer3* with



392 Bowtie2 using default parameters plus `--no-unal`. Tag directories were created and RNAPII  
393 signal was quantified as for spike-in RNAPII ChIP-seq data, except that RPM normalization was  
394 used. We quantified signal at the 50 most highly RNAPII-occupied, SAGA-dominated genes and  
395 the 500 most highly RNAPII-occupied TFIID-dominated genes as determined by signal in the  
396 WT strain.

397

#### 398 **Data availability**

399 Sequencing data have been deposited with the Gene Expression Omnibus (GSE112721).

400

#### 401 **Acknowledgements**

402 We thank Logan Hille for strain construction, Robert Policastro for helpful discussions  
403 throughout the course of this work, Sebastian Grünberg for critical reading of the manuscript,  
404 and the Indiana University Center for Genomics and Bioinformatics for library construction and  
405 sequencing. This work was supported by Indiana University startup funds (to GEZ)

406 **References**

- 407 1. **Will CL, Lührmann R.** 2011. Spliceosome Structure and Function. Cold Spring Harbor  
408 Perspectives in Biology **3**:a003707.
- 409 2. **Dupuis-Sandoval F, Poirier M, Scott MS.** 2015. The emerging landscape of small  
410 nucleolar RNAs in cell biology. Wiley Interdisciplinary Reviews: RNA **6**:381-397.
- 411 3. **Guiro J, Murphy S.** 2017. Regulation of expression of human RNA polymerase II-  
412 transcribed snRNA genes. Open Biology **7**:170073.
- 413 4. **Kuhlman TC, Cho H, Reinberg D, Hernandez N.** 1999. The General Transcription  
414 Factors IIA, IIB, IIF, and IIE Are Required for RNA Polymerase II Transcription from the  
415 Human U1 Small Nuclear RNA Promoter. Mol Cell Biol **19**:2130-2141.
- 416 5. **Glover-Cutter K, Laroche S, Erickson B, Zhang C, Shokat K, Fisher RP, Bentley  
417 DL.** 2009. TFIIF-Associated Cdk7 Kinase Functions in Phosphorylation of C-Terminal  
418 Domain Ser7 Residues, Promoter-Proximal Pausing, and Termination by RNA  
419 Polymerase II. Mol Cell Biol **29**:5455-5464.
- 420 6. **Zaborowska J, Taylor A, Roeder RG, Murphy S.** 2012. A novel TBP-TAF complex on  
421 RNA Polymerase II-transcribed snRNA genes. Transcription **3**:92-104.
- 422 7. **Sadowski CL, Henry RW, Lobo SM, Hernandez N.** 1993. Targeting TBP to a non-  
423 TATA box cis-regulatory element: a TBP-containing complex activates transcription from  
424 snRNA promoters through the PSE. Genes Dev **7**:1535-1548.
- 425 8. **Henry RW, Sadowski CL, Kobayashi R, Hernandez N.** 1995. A TBP-TAF complex  
426 required for transcription of human snRNA genes by RNA polymerases II and III. Nature  
427 **374**:653.
- 428 9. **Henry RW, Mittal V, Ma B, Kobayashi R, Hernandez N.** 1998. SNAP19 mediates the  
429 assembly of a functional core promoter complex (SNAP(c)) shared by RNA polymerases  
430 II and III. Genes Dev **12**:2664-2672.
- 431 10. **Hu D, Smith Edwin R, Garruss Alexander S, Mohaghegh N, Varberg Joseph M, Lin  
432 C, Jackson J, Gao X, Saraf A, Florens L, Washburn Michael P, Eissenberg Joel C,  
433 Shilatifard A.** 2013. The Little Elongation Complex Functions at Initiation and Elongation  
434 Phases of snRNA Gene Transcription. Mol Cell **51**:493-505.
- 435 11. **Baillat D, Hakimi M-A, Näär AM, Shilatifard A, Cooch N, Shiekhatar R.** 2005.  
436 Integrator, a Multiprotein Mediator of Small Nuclear RNA Processing, Associates with  
437 the C-Terminal Repeat of RNA Polymerase II. Cell **123**:265-276.
- 438 12. **Rienzo M, Casamassimi A.** 2016. Integrator complex and transcription regulation:  
439 Recent findings and pathophysiology. Biochim Biophys Acta **1859**:1269-1280.
- 440 13. **Schramm L, Hernandez N.** 2002. Recruitment of RNA polymerase III to its target  
441 promoters. Genes Dev **16**:2593-2620.
- 442 14. **Jawdekar GW, Henry RW.** 2008. Transcriptional regulation of human small nuclear  
443 RNA genes. Biochim Biophys Acta **1779**:295-305.
- 444 15. **Murphy S, Yoon JB, Gerster T, Roeder RG.** 1992. Oct-1 and Oct-2 potentiate  
445 functional interactions of a transcription factor with the proximal sequence element of  
446 small nuclear RNA genes. Mol Cell Biol **12**:3247-3261.
- 447 16. **James Fresse N, Canella D, Praz V, Michaud J, Romascano D, Hernandez N.**  
448 2012. Genomic Study of RNA Polymerase II and III SNAPc-Bound Promoters Reveals a  
449 Gene Transcribed by Both Enzymes and a Broad Use of Common Activators. PLoS  
450 Genet **8**:e1003028.
- 451 17. **Mattaj IW, Dathan NA, Parry HD, Carbon P, Krol A.** 1988. Changing the RNA  
452 polymerase specificity of U snRNA gene promoters. Cell **55**:435-442.
- 453 18. **Lobo SM, Hernandez N.** 1989. A 7 bp mutation converts a human RNA polymerase II  
454 snRNA promoter into an RNA polymerase III promoter. Cell **58**:55-67.

- 455 19. **Harismendy O, Gendrel C-G, Soularue P, Gidrol X, Sentenac A, Werner M,**  
456 **Lefebvre O.** 2003. Genome-wide location of yeast RNA polymerase III transcription  
457 machinery. *EMBO (European Molecular Biology Organization) Journal* **22**:4738-4747.
- 458 20. **Moehle CM, Hinnebusch AG.** 1991. Association of RAP1 binding sites with stringent  
459 control of ribosomal protein gene transcription in *Saccharomyces cerevisiae*. *Mol Cell*  
460 *Biol* **11**:2723-2735.
- 461 21. **Qu L-H, Henras A, Lu Y-J, Zhou H, Zhou W-x, Zhu Y-Q, Zhao J, Henry Y,**  
462 **Caizergues-Ferrer M, Bachellerie J-P.** 1999. Seven Novel Methylation Guide Small  
463 Nucleolar RNAs Are Processed from a Common Polycistronic Transcript by Rat1p and  
464 RNase III in Yeast. *Mol Cell Biol* **19**:1144-1158.
- 465 22. **Preti M, Ribeyre C, Pascali C, Bosio MC, Cortelazzi B, Rougemont J, Guarnera E,**  
466 **Naef F, Shore D, Dieci G.** 2010. The Telomere-Binding Protein Tbf1 Demarcates  
467 snoRNA Gene Promoters in *Saccharomyces cerevisiae*. *Mol Cell* **38**:614-620.
- 468 23. **Plaschka C, Lariviere L, Wenzek L, Seizl M, Hemann M, Tegunov D, Petroitchenko**  
469 **EV, Borchers CH, Baumeister W, Herzog F, Villa E, Cramer P.** 2015. Architecture of  
470 the RNA polymerase II-Mediator core initiation complex. *Nature* **518**:376-380.
- 471 24. **Warfield L, Ramachandran S, Baptista T, Devys D, Tora L, Hahn S.** 2017.  
472 Transcription of Nearly All Yeast RNA Polymerase II-Transcribed Genes Is Dependent  
473 on Transcription Factor TFIID. *Mol Cell* **68**:118-129.
- 474 25. **Petrenko N, Jin Y, Wong KH, Struhl K.** 2017. Evidence that Mediator is essential for  
475 Pol II transcription, but is not a required component of the preinitiation complex in vivo.  
476 *eLife* **6**:e28447.
- 477 26. **Jeronimo C, Robert F.** 2017. The Mediator Complex: At the Nexus of RNA Polymerase  
478 II Transcription. *Trends Cell Biol* **27**:765-783.
- 479 27. **Krebs AR, Demmers J, Karmodiya K, Chang NC, Chang AC, Tora L.** 2010. ATAC  
480 and Mediator coactivators form a stable complex and regulate a set of non-coding RNA  
481 genes. *EMBO Rep* **11**:541-547.
- 482 28. **Takahashi H, Takigawa I, Watanabe M, Anwar D, Shibata M, Tomomori-Sato C,**  
483 **Sato S, Ranjan A, Seidel CW, Tsukiyama T, Mizushima W, Hayashi M, Ohkawa Y,**  
484 **Conaway JW, Conaway RC, Hatakeyama S.** 2015. MED26 regulates the transcription  
485 of snRNA genes through the recruitment of little elongation complex. *Nat Commun*  
486 **6**:5941.
- 487 29. **Zentner GE, Kasinathan S, Xin B, Rohs R, Henikoff S.** 2015. ChEC-seq kinetics  
488 discriminates transcription factor binding sites by DNA sequence and shape in vivo. *Nat*  
489 *Commun* **6**:8733.
- 490 30. **Grünberg S, Henikoff S, Hahn S, Zentner GE.** 2016. Mediator binding to UASs is  
491 broadly uncoupled from transcription and cooperative with TFIID recruitment to  
492 promoters. *The EMBO Journal* **35**:2435-2446.
- 493 31. **Yoshihama M, Nakao A, Kenmochi N.** 2013. snOPY: a small nucleolar RNA  
494 orthological gene database. *BMC Research Notes* **6**:426.
- 495 32. **Jeronimo C, Robert F.** 2014. Kin28 regulates the transient association of Mediator with  
496 core promoters. *Nat Struct Mol Biol* **21**:449-455.
- 497 33. **Jeronimo C, Langelier M-F, Bataille Alain R, Pascal John M, Pugh BF, Robert F.**  
498 2016. Tail and Kinase Modules Differently Regulate Core Mediator Recruitment and  
499 Function In Vivo. *Mol Cell* **64**:455-466.
- 500 34. **Robinson Philip J, Trnka Michael J, Bushnell David A, Davis Ralph E, Mattei P-J,**  
501 **Burlingame Alma L, Kornberg Roger D.** 2016. Structure of a Complete Mediator-RNA  
502 Polymerase II Pre-Initiation Complex. *Cell* **166**:1411-1422.e1416.
- 503 35. **Max T, Søgaard M, Svejstrup JQ.** 2007. Hyperphosphorylation of the C-terminal  
504 Repeat Domain of RNA Polymerase II Facilitates Dissociation of Its Complex with  
505 Mediator. *J Biol Chem* **282**:14113-14120.

- 506 36. **Wong Koon H, Jin Y, Struhl K.** 2014. TFIIH Phosphorylation of the Pol II CTD  
507 Stimulates Mediator Dissociation from the Preinitiation Complex and Promoter Escape.  
508 *Mol Cell* **54**:601-612.
- 509 37. **Fan X, Chou DM, Struhl K.** 2006. Activator-specific recruitment of Mediator in vivo. *Nat*  
510 *Struct Mol Biol* **13**:117-120.
- 511 38. **Cevher MA, Shi Y, Li D, Chait BT, Malik S, Roeder RG.** 2014. Reconstitution of active  
512 human core Mediator complex reveals a critical role of the MED14 subunit. *Nat Struct*  
513 *Mol Biol* **21**:1028-1034.
- 514 39. **Nishimura K, Fukagawa T, Takisawa H, Kakimoto T, Kanemaki M.** 2009. An auxin-  
515 based degron system for the rapid depletion of proteins in nonplant cells. *Nat Methods*  
516 **6**:917-922.
- 517 40. **Ranish JA, Yudkovsky N, Hahn S.** 1999. Intermediates in formation and activity of the  
518 RNA polymerase II preinitiation complex: holoenzyme recruitment and a postrecruitment  
519 role for the TATA box and TFIIIB. *Genes Dev* **13**:49-63.
- 520 41. **Chen X-F, Lehmann L, Lin Justin J, Vashisht A, Schmidt R, Ferrari R, Huang C,**  
521 **McKee R, Mosley A, Plath K, Kurdistani Siavash K, Wohlschlegel J, Carey M.** 2012.  
522 Mediator and SAGA Have Distinct Roles in Pol II Preinitiation Complex Assembly and  
523 Function. *Cell Rep* **2**:1061-1067.
- 524 42. **Eyboulet F, Wydau-Dematteis S, Eychenne T, Alibert O, Neil H, Boschiero C,**  
525 **Nevers M-C, Volland H, Cornu D, Redeker V, Werner M, Soutourina J.** 2015.  
526 Mediator independently orchestrates multiple steps of preinitiation complex assembly in  
527 vivo. *Nucleic Acids Res* **43**:9214-9231.
- 528 43. **Eychenne T, Novikova E, Barrault M-B, Alibert O, Boschiero C, Peixeiro N, Cornu**  
529 **D, Redeker V, Kuras L, Nicolas P, Werner M, Soutourina J.** 2016. Functional  
530 interplay between Mediator and TFIIIB in preinitiation complex assembly in relation to  
531 promoter architecture. *Genes Dev* doi:10.1101/gad.285775.116.
- 532 44. **Jedidi I, Zhang F, Qiu H, Stahl SJ, Palmer I, Kaufman JD, Nadaud PS, Mukherjee S,**  
533 **Wingfield PT, Jaroniec CP, Hinnebusch AG.** 2010. Activator Gcn4 Employs Multiple  
534 Segments of Med15/Gal11, Including the KIX Domain, to Recruit Mediator to Target  
535 Genes in Vivo. *J Biol Chem* **285**:2438-2455.
- 536 45. **Herbig E, Warfield L, Fish L, Fishburn J, Knutson BA, Moorefield B, Pacheco D,**  
537 **Hahn S.** 2010. Mechanism of Mediator Recruitment by Tandem Gcn4 Activation  
538 Domains and Three Gal11 Activator-Binding Domains. *Mol Cell Biol* **30**:2376-2390.
- 539 46. **Huisinga KL, Pugh BF.** 2004. A Genome-Wide Housekeeping Role for TFIIID and a  
540 Highly Regulated Stress-Related Role for SAGA in *Saccharomyces cerevisiae*. *Mol Cell*  
541 **13**:573-585.
- 542 47. **Ansari SA, Ganapathi M, Benschop JJ, Holstege FCP, Wade JT, Morse RH.** 2012.  
543 Distinct role of Mediator tail module in regulation of SAGA-dependent, TATA-containing  
544 genes in yeast. *EMBO (European Molecular Biology Organization) Journal* **31**:44-57.
- 545 48. **Paul E, Zhu ZI, Landsman D, Morse RH.** 2015. Genome-Wide Association of Mediator  
546 and RNA Polymerase II in Wild-Type and Mediator Mutant Yeast. *Mol Cell Biol* **35**:331-  
547 342.
- 548 49. **Reavey CT, Hickman MJ, Dobi KC, Botstein D, Winston F.** 2015. Analysis of  
549 Polygenic Mutants Suggests a Role for Mediator in Regulating Transcriptional Activation  
550 Distance in *Saccharomyces cerevisiae*. *Genetics* **201**:599-612.
- 551 50. **Kim TW, Kwon Y-J, Kim JM, Song Y-H, Kim SN, Kim Y-J.** 2004. MED16 and MED23  
552 of Mediator are coactivators of lipopolysaccharide- and heat-shock-induced  
553 transcriptional activators. *Proc Natl Acad Sci USA* **101**:12153-12158.
- 554 51. **Sekine H, Okazaki K, Ota N, Shima H, Katoh Y, Suzuki N, Igarashi K, Ito M,**  
555 **Motohashi H, Yamamoto M.** 2016. The Mediator Subunit MED16 Transduces NRF2-  
556 Activating Signals into Antioxidant Gene Expression. *Mol Cell Biol* **36**:407-420.

- 557 52. **Uthe H, Vanselow JT, Schlosser A.** 2017. Proteomic Analysis of the Mediator Complex  
558 Interactome in *Saccharomyces cerevisiae*. *Scientific Reports* **7**:43584.
- 559 53. **Petrenko N, Jin Y, Wong Koon H, Struhl K.** 2016. Mediator Undergoes a  
560 Compositional Change during Transcriptional Activation. *Mol Cell* **64**:443-454.
- 561 54. **Rohland N, Reich D.** 2012. Cost-effective, high-throughput DNA sequencing libraries  
562 for multiplexed target capture. *Genome Res* **22**:939-946.
- 563 55. **Langmead B, Salzberg SL.** 2012. Fast gapped-read alignment with Bowtie 2. *Nat*  
564 *Methods* **9**:357-359.
- 565 56. **Zhao X, Muller EGD, Rothstein R.** 1998. A Suppressor of Two Essential Checkpoint  
566 Genes Identifies a Novel Protein that Negatively Affects dNTP Pools. *Mol Cell* **2**:329-  
567 340.
- 568 57. **Heinz S, Benner C, Spann N, Bertolino E, Lin YC, Laslo P, Cheng JX, Murre C,**  
569 **Singh H, Glass CK.** 2010. Simple Combinations of Lineage-Determining Transcription  
570 Factors Prime cis-Regulatory Elements Required for Macrophage and B Cell Identities.  
571 *Mol Cell* **38**:576-589.
- 572 58. **Quinlan AR, Hall IM.** 2010. BEDTools: a flexible suite of utilities for comparing genomic  
573 features. *Bioinformatics* **26**:841-842.
- 574
- 575

576 **Figure legends**

577 **Figure 1. Mediator associates with sn/snoRNA genes**

578 (A) Genome browser view of Med8, Med14, and Med3 ChEC-seq signal at a representative  
579 sn/snoRNA-containing region of the yeast genome. (B) Average plot of Med8, Med14, Med3,  
580 and free MNase ChEC-seq signal at sn/snoRNA genes (n = 58). (C) Genome browser view of  
581 MetaMediator ChIP-chip signal in 1-NA-PP1-treated WT and *kin28as* cells at a representative  
582 sn/snoRNA-containing region of the yeast genome. (D) Average plot of MetaMediator ChIP-chip  
583 signal in 1-NA-PP1-treated WT and *kin28as* cells at sn/snoRNA genes.

584

585 **Figure 2. Mediator depletion reduces RNAPII binding to sn/snoRNA genes**

586 Genome browser views of spike in-normalized RNAPII ChIP-seq signal from WT and Med14-  
587 AID strains at three regions of the yeast genome containing one or more sn/snoRNA genes.

588

589 **Figure 3. Mediator loss globally reduces RNAPII occupancy in sn/snoRNA genes**

590 Boxplots of spike in-normalized  $\log_2(3\text{-IAA/DMSO})$  RNAPII ChIP-seq signal at sn/snoRNA and  
591 mRNA genes in WT and Med14-AID strains. The median  $\log_2(\text{fold change})$  in RNAPII ChIP-seq  
592 signal for each condition is provided.

593

594 **Figure 4. Mediator destabilization reduces PIC formation at sn/snoRNA promoters**

595 (A) Western blot showing the kinetics of Med14-AID depletion. A Histone H3 blot is shown as a  
596 loading control. (B) Spot assays analyzing the growth of parental and Med14-AID strains on  
597 YPD containing DMSO or 500  $\mu\text{M}$  3-IAA. (C) Boxplots of RPM-normalized  $\log_2(3\text{-IAA/DMSO})$   
598 TFIIB ChIP-seq signal at sn/snoRNA and mRNA genes in WT and Med14-AID strains.

599

600 **Figure 5. Mediator tail depletion does not affect Mediator association with sn/snoRNA**  
601 **genes or sn/snoRNA transcription**

602 (A) Boxplots of RPM-normalized  $\log_2(\text{med15}\Delta/\text{WT})$  Med17 ChEC-seq signal at sn/snoRNA  
603 genes, the top 50 most highly Med17-occupied SAGA-dominated genes, and the top 500 most  
604 highly Med17-occupied TFIID-dominated genes. The median  $\log_2(\text{fold change})$  in Med17 ChEC-  
605 seq signal for each condition is provided. (B) Boxplots of RPM-normalized  $\log_2(\text{taildel}/\text{WT})$   
606 RNAPII ChIP-seq signal at sn/snoRNA genes, the top 50 most highly Med17-occupied SAGA-  
607 dominated genes, and the top 500 most highly Med17-occupied TFIID-dominated genes. The  
608 median  $\log_2(\text{fold change})$  in Med17 ChEC-seq signal for each condition is provided. (C)  
609 Genome browser views of Med8 ChEC-seq signal in WT and *med15* $\Delta$  yeast and RNAPII ChIP-  
610 seq signal in WT and tail deletion yeast at the *snR8* locus.

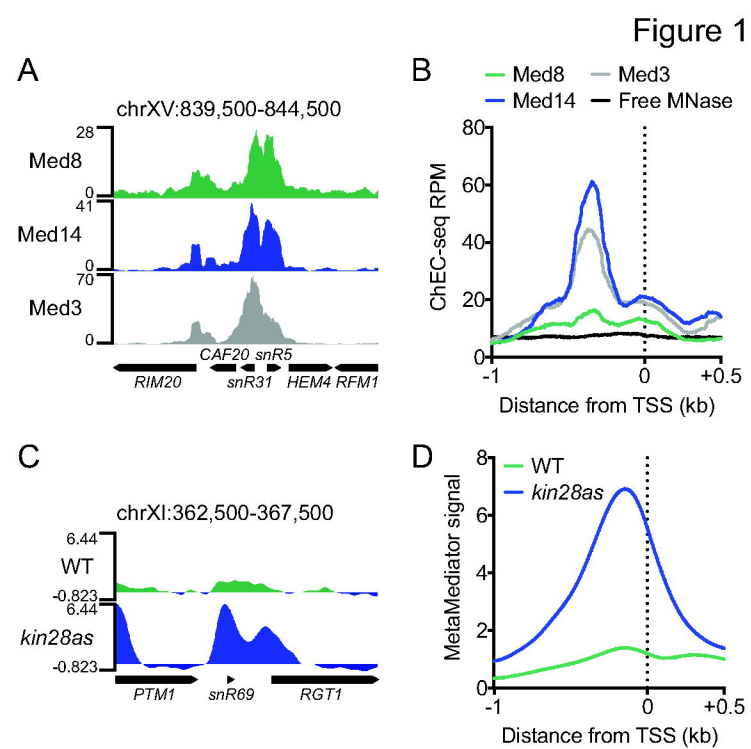



Figure 2

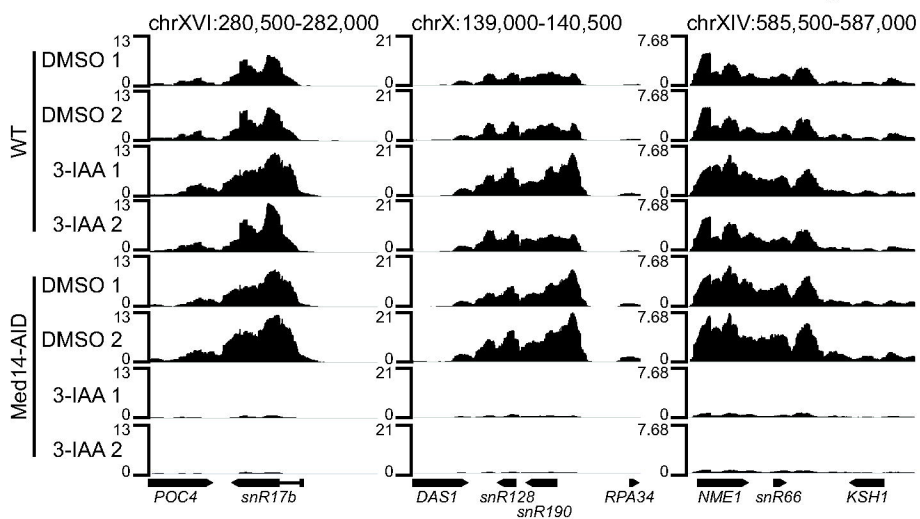

Figure 3

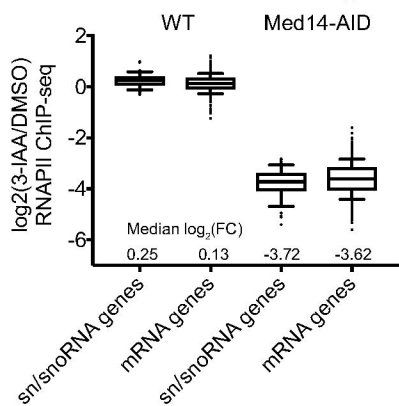

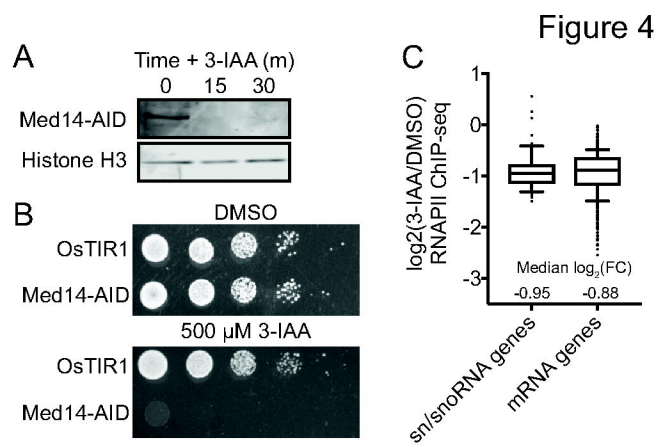

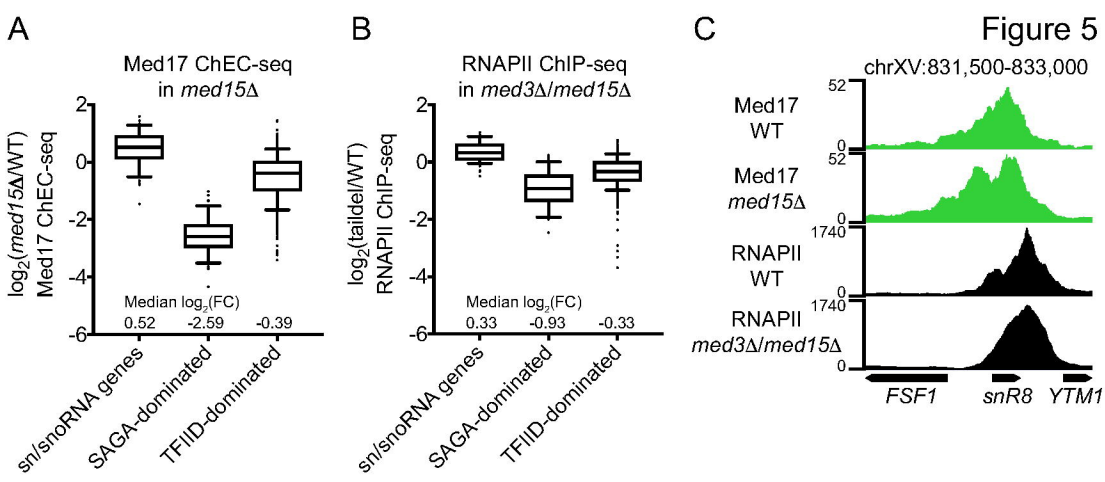

Source: https://www.biorxiv.org/content/10.1101/352906v2.full.pdf
